# Supplementary material
Source: PubMed Central journal article supplement (PMC6479043)

**Supplementary Table 1.** Primer sequences used for rtPCR analysis studies

| <b>Primer</b> | <b>Sequence</b>           |
|---------------|---------------------------|
| LDH Forward   | GACGCAAGATTGCCGTTATT      |
| LDH Reverse   | TATGTGGAAGCCCAGAAACC      |
| SUB1 Forward  | TCAAGTTGTTGCCATATTTATTGGT |
| SBU1 Reverse  | CCTAAATGTTTCCATGCCATCAA   |
| H18s Forward  | CCGATAACGAACGAGACTCTGG    |
| H18s Reverse  | TAGGGTAGGCACACGCTGAGCC    |

**Supplementary Table 2.** Single-stranded antisense sequences. Antisense sequences sorted by sequence, size and location from 5' end of SUB1 and CDPK5 mRNA, respectively.

| <b>Target</b> | <b>ssRNA sequence</b>               | <b>Size</b> | <b>Location</b> |
|---------------|-------------------------------------|-------------|-----------------|
| SUB1 #1       | GAU GAG CUU GUU GGA AUC AAA UCT G   | 25          | 544-569         |
| SUB1 #2       | GAA UGG AUU CUG AAG AAG UAA AAA     | 24          | 2837-2862       |
| SUB1 #3       | GTT GAA GGT CGG AGC TCT G           | 20          | 106-126         |
| SUB1 #4       | GAA CCA GAT CAG GAA GTT AGG CTT GCA | 27          | 688-714         |
| SUB1 #5       | GAA GAA GAG GAT GAT GGA GA          | 20          | 3292-3372       |
| CDPK5 #1      | CAG GGG AGC UUC AGC AAA A           | 19          | 218-236         |
| CDPK5 #2      | GGG ACA CAT TTA TGC AGC TAT GTGT    | 25          | 183-207         |
| CDPK5 #3      | GAG AGG CTC TTA TGG ATC TGT TGTA    | 25          | 576-600         |
| CDPK5 #4      | CAT GCG CTT GTT AAC AGG AAT ATTA    | 25          | 517-541         |
| CDPK5 #5      | AGG GAA TAC AGG AAC AAG GC          | 20          | 128-153         |

Supplementary Figure **S1**. The expression pattern of serine protease (*cgd2\_3660*) was observed using rtPCR. Expression peaks at the beginning of infection (1hour post-infection) and wanes to minimal levels for the rest of the asexual replication stage. This observation is contrary to what was observed for SUB1 expression levels.

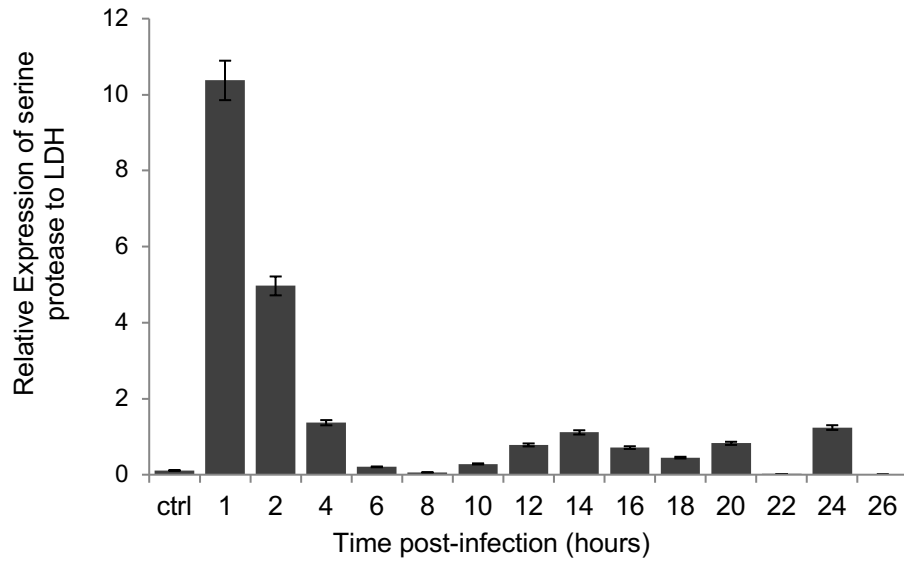

**Supplementary Figure S2.** CDPK5 expression pattern in infection of HCT8-cells with *Cryptosporidium parvum*. We observed a peak of expression taking place at the time of egress (24 hours post-infection).

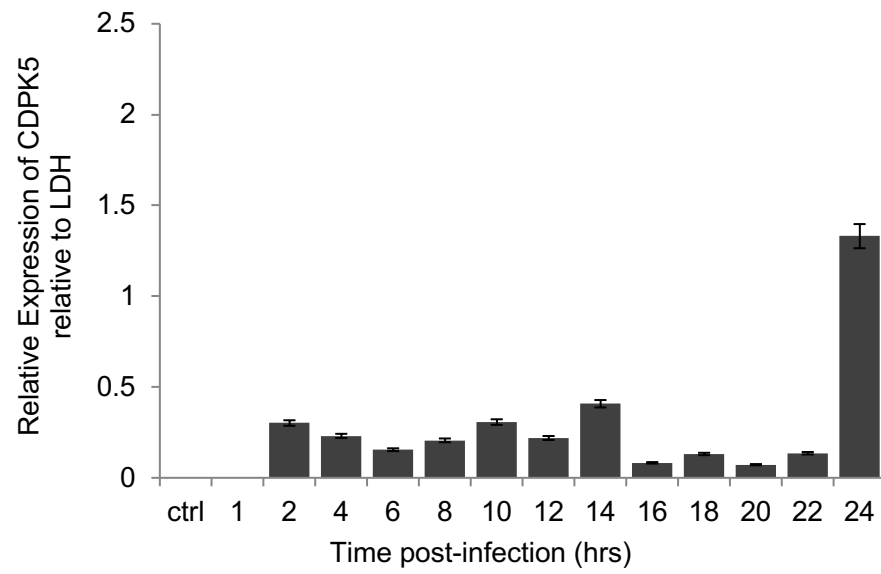

**Supplementary Figure S3.** A) Antisense sequences designed for CDPK5 silencing were tested for potency. Segment #1 was the only one that demonstrated significant silencing in oocysts and was used for additional experimentation. B.) CDPK5 silenced samples demonstrated similar egress compared to wild-type controls. We observed no changes in the levels of egressed parasites from collected supernatants compared to controls at 24 hours post-infection.

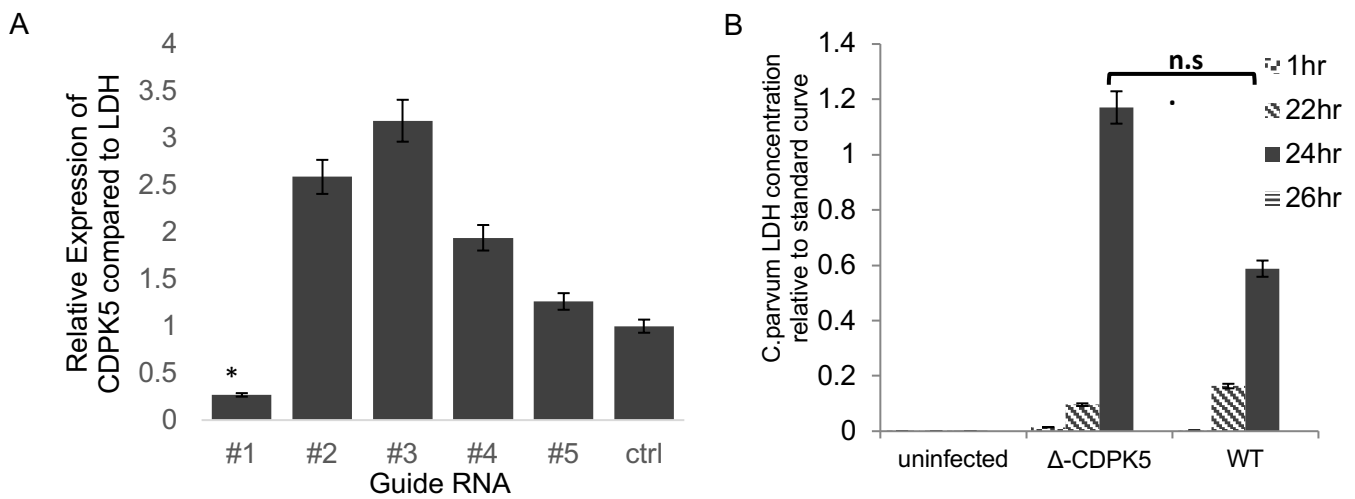

**Supplementary Figure S4.**  $\Delta$ SUB1 parasites exhibited decreased levels of egress in comparison to wild-type controls. At 1 and 20 hours post-infection, there is minimal or no parasites detected in supernatant in both treated and control samples. At 24 hours post-infection, there is a peak of egress observed in wild-type samples, where  $\Delta$ SUB1 parasites have a significant decrease. At 26 hours post-infection, there is no detection of parasites in both wild-type and treated samples.

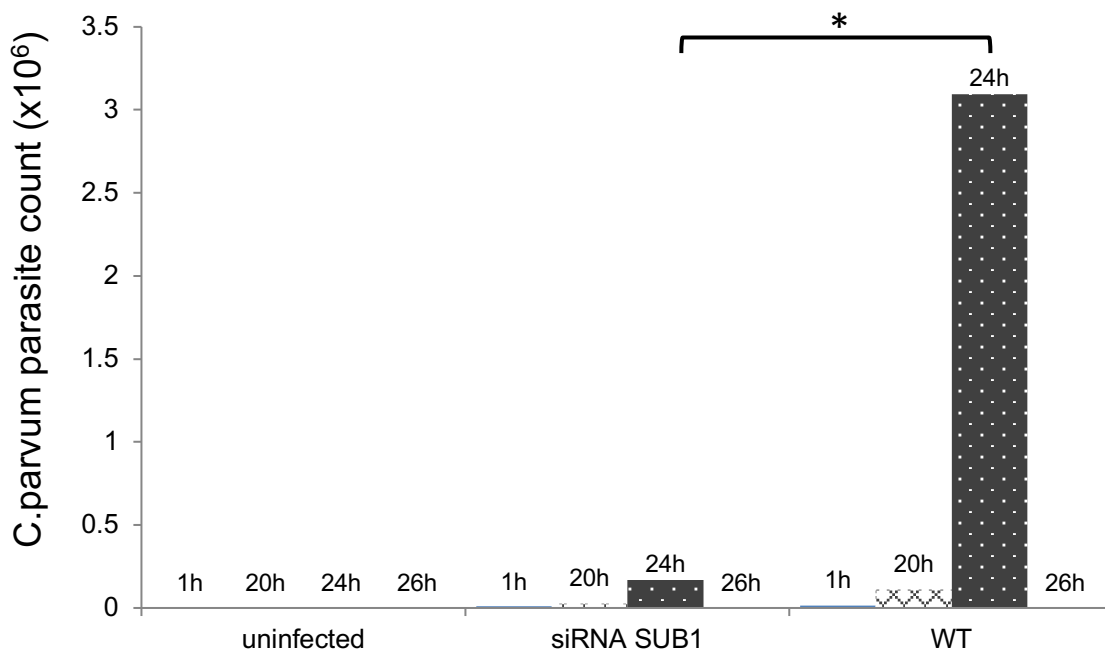

Supplement: IAI.00784-18-s0001.pdf [file IAI.00784-18-s0001.pdf]
